# Supplementary material for: BTN3A2 protects against Escherichia coli infection: Insights from genome-wide association and Mendelian randomization
Source: Research Square preprint supplement (doi:10.21203/rs.3.rs-8402336/v1), 2026-02-03
Supplement: Supplementary file 1 [file 0e768cc306d0f97e8aa336b2.docx]

Supplemental methods and results for:

**BTN3A2 protects against *Escherichia coli* infection: insights from genome-wide association and Mendelian randomization**

Michael Marks-Hultström1,2, Mikael Eriksson1, Finn Schulz3, Bram Burger1, Kristoffer Strålin4,5, Volkan Özenci6,7, Anders Krifors3,8, Fredrik Sjövall9,10, Guillaume Butler-Laporte11,12, Miklos Lipcsey1,13.

1: Anaesthesiology and Intensive Care Medicine, Department of Surgical Sciences, Uppsala University, Uppsala, Sweden.

2: Integrative Physiology, Department of Medical Cell Biology, Uppsala University, Uppsala, Sweden.

3: Department of Medical Sciences, Uppsala University, Uppsala, Sweden.

4: Department of Medicine, Huddinge, Karolinska Institutet, Stockholm, Sweden.

5: Department of Infectious Diseases, Karolinska University Hospital, Stockholm, Sweden.

6: Division of Clinical Microbiology, Department of Laboratory Medicine, Karolinska Institutet,

7: Department of Clinical Microbiology, Karolinska University Hospital, Huddinge, Stockholm, Sweden

8: Centre for Clinical Research, Region Västmanland-Uppsala University, Västmanland Hospital Västerås, Västerås, Sweden.

9: Department of Intensive and Perioperative Care, Skane University Hospital, Malmö, Sweden.

10: Department of Clinical Sciences, Lund University, Malmö, Sweden.

11: Division of Infectious Diseases, McGill University Health Centre, Montréal, Canada.

12: Lady Davis Institute for Medical Research, Jewish General Hospital, Montréal, Canada.

13: Hedenstierna Laboratory, Department of Surgical Sciences, Uppsala University, Uppsala, Sweden.

**Table of contents** **Page**

[Supplemental tables 4](#_Toc217025457)

[Supplemental Table S1. *E. coli* susceptibility cohort 4](#_Toc217025458)

[Supplemental Table S2. Severe *E. coli* infection cohort 5](#_Toc217025459)

[Supplemental table S3: Genome-wide significant and suggestive loci for *E. coli* susceptibility 6](#_Toc217025460)

[Supplemental table S4: Genome-wide significant and suggestive loci for severe *E. coli* infection 7](#_Toc217025461)

[Supplemental table S5: Gene expression QTL (eQTL) and splice-form WQTL (sQTL) for the lead SNP rs9366673 for *E.* *coli* susceptibility, only hit was in Pituitary. 8](#_Toc217025462)

[Supplemental table S6: Gene expression QTL (eQTL) and splice-form QTL (sQTL) for the lead SNP rs9366673 for Severe *E.* *coli* infection in Whole blood and EBV-transformed lymphocytes 9](#_Toc217025463)

[Supplemental table S7: Genetic instruments for BNTN3A2 Mendelian randomisation 10](#_Toc217025464)

[Supplemental table S8: Results of BTN3A2 Mendelian randomisation and sensitivity analyses 11](#_Toc217025465)

[Supplemental figures 12](#_Toc217025466)

[Supplemental Figure S1. Histogram of age for the case and control populations. 12](#_Toc217025467)

[Supplemental Figure S2. Susceptibility Quantile-Quantile (Q-Q) plot. 13](#_Toc217025468)

[Supplemental Figure S3. Severe infection Quantile-Quantile (Q-Q) plot. 14](#_Toc217025469)

[Supplemental Figure S4. Locus Zoom *E. coli* susceptibility Chr 6 rs9366673 (1.71E-07) 15](#_Toc217025470)

[Supplemental Figure S5. Locus Zoom *E. coli* susceptibility Chr 13 rs1287556 (3.93e-7) 16](#_Toc217025471)

[Supplemental Figure S6. Locus Zoom *E. coli* susceptibility Chr 14 rs72702956 (p=1.86E-07) 17](#_Toc217025472)

[Supplemental Figure S7. Locus Zoom *E. coli* susceptibility Chr 17 rs147709654 (1.96E-06) 18](#_Toc217025473)

[Supplemental Figure S8. Locus Zoom Severe *E. coli* infection Chr 3 rs62238581 (3.80E-07) 19](#_Toc217025474)

[Supplemental Figure S9. Locus Zoom Severe *E. coli* infection Chr 3 rs113293261 (4.56E-07) 20](#_Toc217025475)

[Supplemental Figure S10. Locus Zoom Severe *E. coli* infection Chr 16 rs7203634 (6.69E-07) 21](#_Toc217025476)

[Supplemental Figure S11. Locus Zoom Severe *E. coli* infection Chr 2 rs74451679 (8.48E-07) 22](#_Toc217025477)

[Supplemental Figure S12. ABT1 Blood Protein Atlas 23](#_Toc217025478)

[Supplementary data Description of Pre-imputation QC per cohort 24](#_Toc217025479)

[Epihealth genotype data QC and imputation 24](#_Toc217025480)

[COSM-C genotype data 25](#_Toc217025481)

[SIMPLER genotype data 25](#_Toc217025482)

[SMCC genotype data 26](#_Toc217025483)

# Supplemental tables

## Supplemental Table S1. *E. coli* susceptibility cohort

Number of individuals and basic demography from each contributing subcohort.

|  | **MAICS** | **Epihealth** | **Simpler** | **STR** |
| --- | --- | --- | --- | --- |
| ***E. coli* infection** |  |  |  |  |
| **Total sample size (n)** | 56044 | 19148 | 24690 | 12206 |
| **Effective sample size (n)** | 39856 | 10588 | 20302 | 7590 |
| **Sex** |  |  |  |  |
| **Men** | 26604 | 8467 | 13214 | 4923 |
| **Women** | 29440 | 10681 | 11476 | 7283 |
| **Age (median [min, max])** | 70 (0, 104) | 64 (31, 87) | 77 (48, 104) | 40 (0, 101) |
|  |  |  |  |  |
| **Cases** |  |  |  |  |
| **n** | 12962 | 3173 | 7439 | 2350 |
| **Sex** |  |  |  |  |
| **Men** | 4640 | 885 | 3160 | 595 |
| **Women** | 8322 | 2288 | 4279 | 1755 |
| **Age (median [min, max])** | 74 (0, 104) | 66 (31, 87) | 80 (48, 104) | 58 (0, 101) |
|  |  |  |  |  |
| **Controls** |  |  |  |  |
| **N** | 43082 | 15975 | 15975 | 9856 |
| **Sex** |  |  |  |  |
| **Men** | 21964 | 7582 | 10054 | 4328 |
| **Women** | 21118 | 8393 | 7197 | 5528 |
| **Age (median [min, max])** | 69 (10, 101) | 64 (41, 82) | 76 (56, 101) | 37 (10, 99) |

## Supplemental Table S2. Severe *E. coli* infection cohort

Number of individuals and basic demography from each contributing subcohort.

| **Severe E. coli infection** | **MAICS** | **Epihealth** | **Simpler** | **STR** |
| --- | --- | --- | --- | --- |
| **Total sample size (n)** | 50649 | 16792 | 22143 | 11714 |
| **Effective sample size (n)** | 23568 | 3108 | 15211 | 4028 |
| **Sex** |  |  |  |  |
| **Men** | 25365 | 7955 | 12441 | 4969 |
| **Women** | 25284 | 8837 | 9702 | 6745 |
| **Age (median [min, max])** | 70 (0, 104) | 64 (31, 87) | 77 (48, 104) | 39 (0, 101) |
|  |  |  |  |  |
| **Cases** |  |  |  |  |
| **n** | 6807 | 817 | 4877 | 1113 |
| **Sex** |  |  |  |  |
| **Men** | 3142 | 373 | 2377 | 392 |
| **Women** | 3665 | 444 | 2500 | 721 |
| **Age (median [min, max])** | 78 (0, 104) | 69 (31, 87) | 81 (48, 104) | 64 (0, 101) |
|  |  |  |  |  |
| **Controls** |  |  |  |  |
| **n** | 43842 | 15975 | 17266 | 10601 |
| **Sex** |  |  |  |  |
| **Men** | 22223 | 7582 | 10064 | 4577 |
| **Women** | 21619 | 8393 | 7202 | 6024 |
| **Age (median [min, max])** | 69 (10, 101) | 64 (41, 82) | 76 (56, 101) | 37 (10, 99) |

## Supplemental table S3: Genome-wide significant and suggestive loci for *E. coli* susceptibility

| SNP | RSID | A1 | A2 | N | AF1 | BETA | SE | P |
| --- | --- | --- | --- | --- | --- | --- | --- | --- |
| 4:36479467:T:C | rs6819738 | C | T | 55273 | 0.731777 | 0.09368 | 0.0166344 | 1.78E-08 |
| 6:26893329:C:G | rs9366673 | G | C | 55850 | 0.187162 | -0.0988479 | 0.0189069 | 1.71E-07 |
| 14:101591920:G:A | rs72702956 | A | G | 55761 | 0.077079 | 0.143902 | 0.0276071 | 1.86E-07 |
| 13:84758142:G:A | rs1287556 | A | G | 55079 | 0.185506 | -0.0967701 | 0.0190781 | 3.93E-07 |
| 18:53225637:T:C | rs11152211 | C | T | 54977 | 0.963867 | -0.192208 | 0.0396648 | 1.26E-06 |
| 2:31606361:G:A | rs45568731 | A | G | 55979 | 0.0101824 | 0.354945 | 0.0737137 | 1.47E-06 |
| 7:112107887:A:G | rs1024568 | G | A | 55377 | 0.123011 | -0.108307 | 0.0225149 | 1.51E-06 |
| 18:57807392:A:G | rs58762507 | G | A | 55146 | 0.125775 | -0.10726 | 0.0222991 | 1.51E-06 |
| 17:10960943:C:A | rs147709654 | A | C | 54437 | 0.00773371 | 0.414805 | 0.0871854 | 1.96E-06 |
| 10:121200210:G:A | rs143056635 | A | G | 55526 | 0.0119313 | 0.321365 | 0.0676671 | 2.04E-06 |
| 3:133365891:A:G | rs76299719 | G | A | 55735 | 0.0409168 | 0.174835 | 0.0369692 | 2.25E-06 |
| 1:188435045:A:G | rs72655825 | G | A | 55602 | 0.00714902 | 0.425047 | 0.0899777 | 2.31E-06 |
| 9:124778945:A:C | rs450818 | C | A | 53654 | 0.0510307 | -0.160907 | 0.0342588 | 2.64E-06 |
| 21:34403770:C:T | rs62216116 | T | C | 54633 | 0.348187 | 0.0730189 | 0.0155878 | 2.81E-06 |
| 9:10094898:A:T | rs75153929 | T | A | 55759 | 0.371823 | -0.0710687 | 0.015196 | 2.91E-06 |
| 6:107991007:C:T | rs846986 | T | C | 55059 | 0.887557 | 0.108653 | 0.0233652 | 3.32E-06 |
| 20:10085054:A:G | rs6074095 | G | A | 55228 | 0.517174 | -0.0680711 | 0.0148671 | 4.68E-06 |
| 18:8703191:C:A | rs682026 | A | C | 55120 | 0.0392235 | 0.174151 | 0.0383921 | 5.73E-06 |
| 12:17518587:A:T | rs2936208 | T | A | 55530 | 0.626769 | -0.0689474 | 0.0153125 | 6.71E-06 |
| 5:121517760:G:A | rs114492711 | A | G | 55942 | 0.00978692 | 0.33594 | 0.0747062 | 6.90E-06 |
| 19:47305124:C:T | rs147552569 | T | C | 55559 | 0.0237675 | -0.216582 | 0.0483415 | 7.46E-06 |
| 6:116132030:G:T | rs11757012 | T | G | 54805 | 0.0467476 | 0.158284 | 0.0353862 | 7.71E-06 |
| 1:37636457:G:T | rs78459977 | T | G | 55691 | 0.020084 | 0.236922 | 0.0529863 | 7.77E-06 |
| 12:28113733:T:C | rs2347591 | C | T | 55522 | 0.933144 | -0.131792 | 0.029492 | 7.87E-06 |
| 16:64261060:A:T | rs146640358 | T | A | 55404 | 0.0121923 | -0.303905 | 0.0682795 | 8.55E-06 |
| 7:158470826:A:G | rs80353907 | G | A | 56007 | 0.00645455 | 0.409487 | 0.0922255 | 8.99E-06 |
| 13:81960044:G:C | rs2774078 | C | G | 53426 | 0.939645 | -0.139533 | 0.0315105 | 9.50E-06 |

## Supplemental table S4: Genome-wide significant and suggestive loci for severe *E. coli* infection

| SNP | RSID | A1 | A2 | N | AF1 | BETA | SE | P |
| --- | --- | --- | --- | --- | --- | --- | --- | --- |
| 6:26472114:A:G | rs198820 | G | A | 50626 | 0.163829 | -0.145716 | 0.0260359 | 2.18E-08 |
| 3:18623942:C:G | rs62238581 | G | C | 48660 | 0.117386 | 0.156856 | 0.0308846 | 3.80E-07 |
| 3:151320010:C:T | rs113293261 | T | C | 48333 | 0.483324 | -0.0995347 | 0.0197337 | 4.56E-07 |
| 16:57590680:G:T | rs7203634 | T | G | 50101 | 0.357408 | 0.100851 | 0.0202912 | 6.69E-07 |
| 2:147198082:C:A | rs74451679 | A | C | 49264 | 0.0196289 | 0.358107 | 0.0727259 | 8.48E-07 |
| 19:743362:G:A | rs116962250 | A | G | 50043 | 0.030194 | 0.274954 | 0.0575354 | 1.76E-06 |
| 7:120927399:T:G | rs78523979 | G | T | 50404 | 0.0079954 | 0.536856 | 0.112879 | 1.97E-06 |
| 10:24048936:G:A | rs11013702 | A | G | 50603 | 0.0193269 | 0.338431 | 0.0712777 | 2.05E-06 |
| 5:137256349:G:C | rs75262693 | C | G | 50259 | 0.0304224 | 0.272201 | 0.0575294 | 2.23E-06 |
| 5:137310557:C:T | rs34379089 | T | C | 50332 | 0.0224112 | 0.311732 | 0.0662834 | 2.56E-06 |
| 9:80354904:C:T | rs2642414 | T | C | 50167 | 0.00738533 | -0.550978 | 0.117623 | 2.81E-06 |
| 2:224898452:A:T | rs201006800 | T | A | 50153 | 0.0242358 | 0.298791 | 0.0644439 | 3.54E-06 |
| 2:218321965:T:C | rs111290890 | C | T | 50014 | 0.0112269 | 0.45332 | 0.0978578 | 3.61E-06 |
| 10:126596007:C:T | rs111837772 | T | C | 49977 | 0.0428697 | 0.221847 | 0.0479541 | 3.72E-06 |
| 6:26124243:G:A | rs9358945 | A | G | 50191 | 0.40312 | 0.0901965 | 0.0196259 | 4.31E-06 |
| 20:42196498:A:G | rs55848276 | G | A | 48959 | 0.0439449 | -0.220235 | 0.0488208 | 6.45E-06 |
| 9:14828944:G:C | rs191253377 | C | G | 49790 | 0.155332 | -0.121053 | 0.0268501 | 6.53E-06 |
| 5:15598330:C:T | rs182539376 | T | C | 49949 | 0.0438347 | 0.21366 | 0.0474647 | 6.75E-06 |
| 6:27357671:A:G | rs71559025 | G | A | 49877 | 0.358903 | 0.0902393 | 0.0201546 | 7.56E-06 |
| 3:73508373:C:T | rs9289851 | T | C | 50425 | 0.00628656 | 0.568911 | 0.127313 | 7.87E-06 |
| 8:28071119:T:C | rs6986290 | C | T | 50366 | 0.356401 | -0.0895598 | 0.0201147 | 8.49E-06 |
| 1:220910011:A:C | rs73092791 | C | A | 50560 | 0.0301721 | 0.253875 | 0.057163 | 8.94E-06 |

## Supplemental table S5: Gene expression QTL (eQTL) and splice-form WQTL (sQTL) for the lead SNP rs9366673 for *E.* *coli* susceptibility, only hit was in Pituitary.

| Gene Symbol | SNP Id | P-Value | NES | Tissue |
| --- | --- | --- | --- | --- |
| NWD2 | rs6819738 | 0.000031 | 0.33 | Pituitary |

## Supplemental table S6: Gene expression QTL (eQTL) and splice-form QTL (sQTL) for the lead SNP rs9366673 for Severe *E.* *coli* infection in Whole blood and EBV-transformed lymphocytes

| **eQTL** |  |  |  |  |
| --- | --- | --- | --- | --- |
| Gene Symbol | SNP Id | P-Value | NES | Tissue |
| BTN3A2 | rs9366673 | 1.70E-36 | -0.44 | Whole blood |
| PRSS16 | rs9366673 | 3.60E-07 | 0.22 | Whole blood |
| ABT1 | rs9366673 | 0.000078 | 0.087 | Whole blood |
| HMGN4 | rs9366673 | 0.00016 | -0.11 | Whole blood |
| BTN3A2 | rs9366673 | 2.3e-15 | -0.50 | Cells - EBV-transformed lymphocytes |
| ENSG00000287966 | rs9366673 | 9.6e-14 | 0.58 | Cells - EBV-transformed lymphocytes |
| LINC00240 | rs9366673 | 1.7e-8 | 0.44 | Cells - EBV-transformed lymphocytes |
|  |  |  |  |  |
| **sQTL** |  |  |  |  |
| Gene Symbol | Intron ID | P-Value | NES |  |
| BTN2A1 | 26474396:26476161:clu_44502_+ | 8.40E-21 | 0.38 | Whole blood |
| HMGN4 | 26538501:26545127:clu_44504_+ | 4.30E-16 | 0.52 | Whole blood |
| BTN2A1 | 26474396:26476161:clu_42069_+ | 1.00E-19 | 0.75 | Cells - EBV-transformed lymphocytes |
| BTN2A1 | 26466088:26467948:clu_42069_+ | 2.10E-16 | -0.78 | Cells - EBV-transformed lymphocytes |
| BTN3A2 | 26374798:26375797:clu_42056_+ | 3.50E-10 | 0.53 | Cells - EBV-transformed lymphocytes |
| HMGN4 | 26540026:26545127:clu_42070_+ | 4.90E-10 | -0.68 | Cells - EBV-transformed lymphocytes |
| HMGN4 | 26538501:26545127:clu_42070_+ | 5.60E-10 | 0.65 | Cells - EBV-transformed lymphocytes |
| HMGN4 | 26538501:26539901:clu_42070_+ | 9.00E-10 | -0.67 | Cells - EBV-transformed lymphocytes |

##

## Supplemental table S7: Genetic instruments for BNTN3A2 Mendelian randomisation

| **Table S7. Instrumental variable statistics and association with BTN3A2** | | | | | | |
| --- | --- | --- | --- | --- | --- | --- |
| SNP | EA | OA | EAF | p-value | beta | s.e |
| rs9357006 | C | A | 0.112 | 1.00 x 10-200 | -1.3446 | 0.0102 |
| rs71557332 | T | C | 0.112 | 3.69 x 10-74 | -1.3106 | 0.0719 |
| rs1624064 | C | T | 0.473 | 4.95 x 10-50 | 0.5736 | 0.0385 |
| rs3799378 | G | A | 0.2256 | 1.00 x 10-200 | -0.7806 | 0.0083 |

SNP single nucleotide polymorphism; EA, effect allele; OA, other allele; EAF, effect allele frequency; beta, logistic regression coefficient of additive effect of the effect allele on BTN3A2; s.e, standard error.

## Supplemental table S8: Results of BTN3A2 Mendelian randomisation and sensitivity analyses

| **Table 2. MR results including test for horizontal pleiotropy** | | | | | |
| --- | --- | --- | --- | --- | --- |
|  |  |  |  | MR Egger | |
| Outcome | Method | OR (95 % CI) | p-value | Intercept | p-value |
| E-coli infection | IVW  MR-Egger  WM | 1.06 (1.03-1.08)  1.11 (1.05-1.18)  1.06 (1.04-1.09) | <0.005  0.065  <0.005 | -0.053 | 0.194 |
| Severe E-coli infection | IVW  MR-Egger  WM | 1.09 (1.05-1.13)  1.17 (1.09-1.26)  1.10 (1.07-1.14) | <0.005  0.054  <0.005 | -0.072 | 0.181 |

Odds ratios representing the effect of one standard deviation increase in BTN3A2 on the risk of the outcome. MR, Mendelian randomization; OR, odds ratio; CI, confidence interval; IVW, Inverse variant weighted meta-analysis; WM, weighted median meta-analysis.

# Supplemental figures

## Supplemental Figure S1. Histogram of age for the case and control populations.

The horizontal axis represents the age at which the first positive culture was taken for cases (black bars). For controls (blue bars), the age corresponds to either the median date of the first positive culture in the case group or the age at death, whichever is lower.


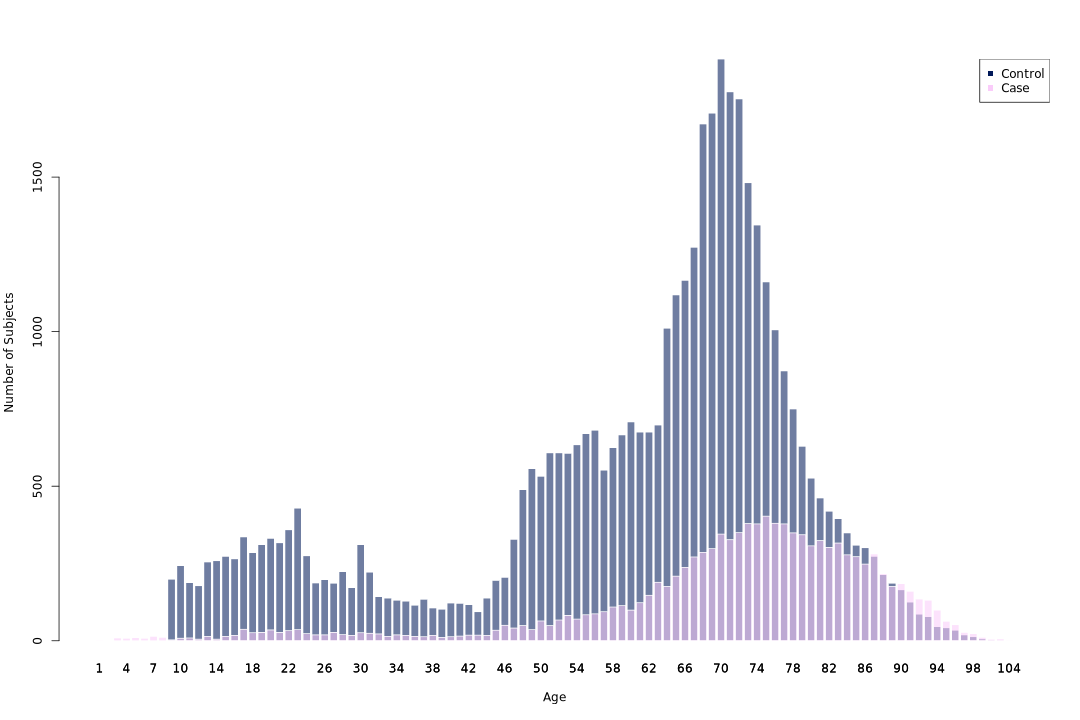


## Supplemental Figure S2. Susceptibility Quantile-Quantile (Q-Q) plot.

The Q-Q plot of the genome-wide association study shows a deviation from the expected null distribution, with a genomic inflation factor (λ) of 0.96215, indicating that the observed deviation is unlikely to be due to random noise or population stratification.


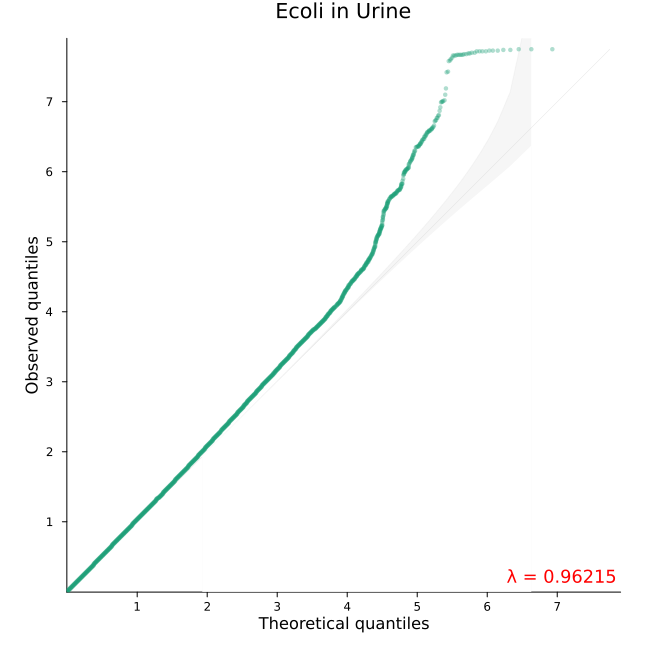


## Supplemental Figure S3. Severe infection Quantile-Quantile (Q-Q) plot.

The Q-Q plot of the genome-wide association study shows a deviation from the expected null distribution, with a genomic inflation factor (λ) of 0.98013, indicating that the observed deviation is unlikely to be due to random noise or population stratification.


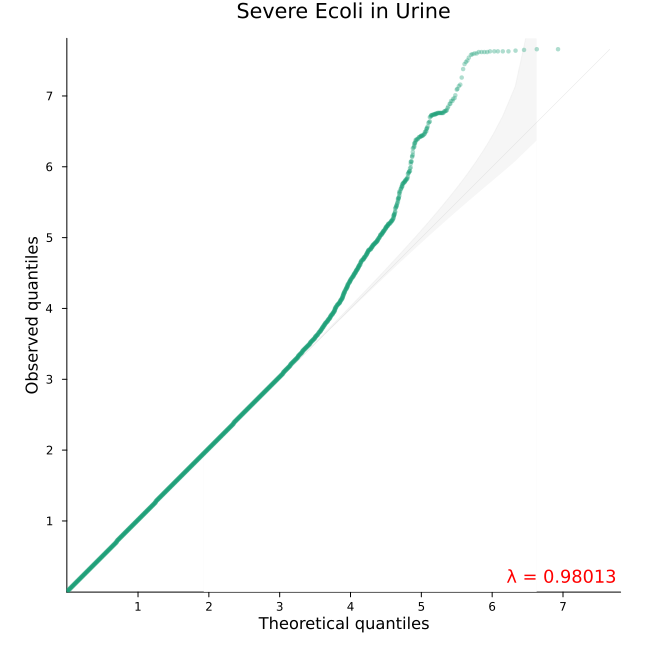


## Supplemental Figure S4. Locus Zoom *E. coli* susceptibility Chr 6 rs9366673 (1.71E-07)


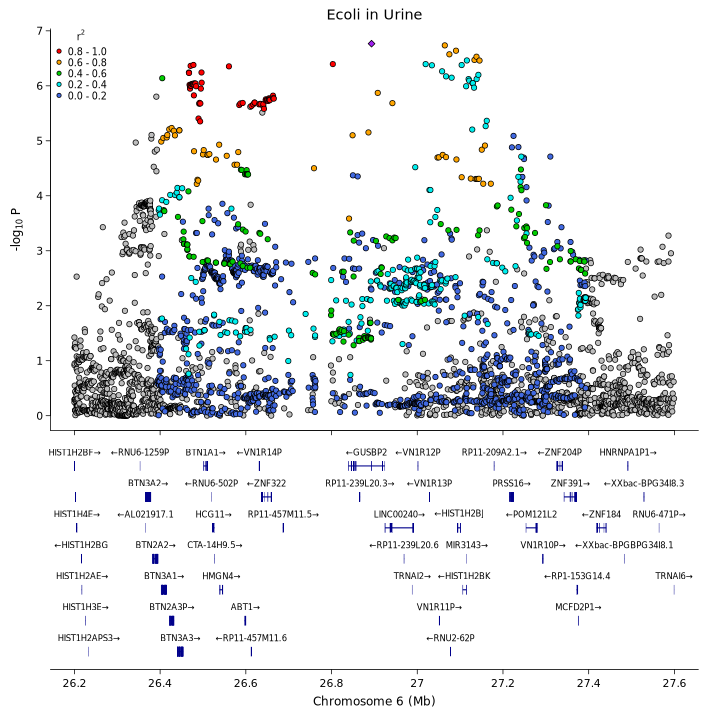


Colocalizes with the genome-wide significant locus for Severe *E. coli* infection.

## Supplemental Figure S5. Locus Zoom *E. coli* susceptibility Chr 13 rs1287556 (3.93e-7)


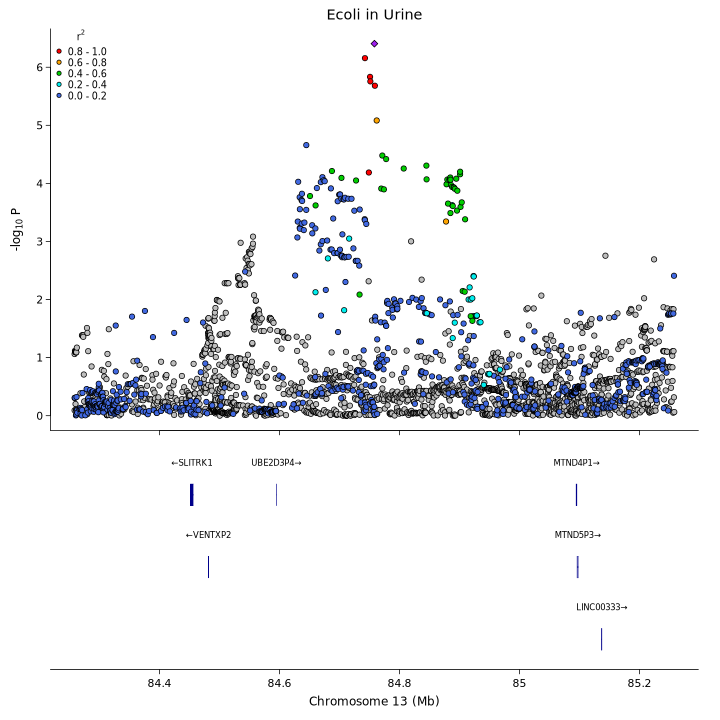


No hits in the GWAS catalog.

No significant eQTLs were found for SNP chr13_81385909_G_C_b38

in tissue All eQTL Tissues

## Supplemental Figure S6. Locus Zoom *E. coli* susceptibility Chr 14 rs72702956 (p=1.86E-07)


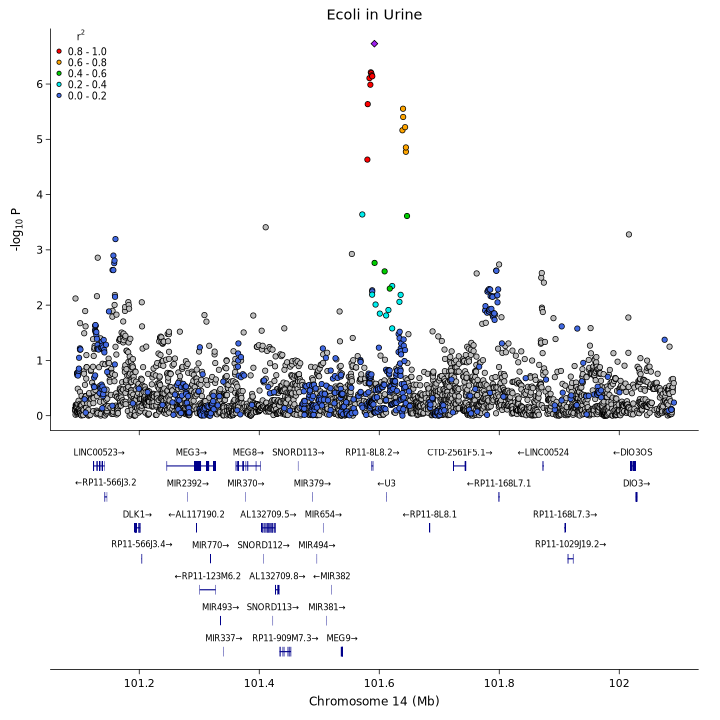


## Supplemental Figure S7. Locus Zoom *E. coli* susceptibility Chr 17 rs147709654 (1.96E-06)


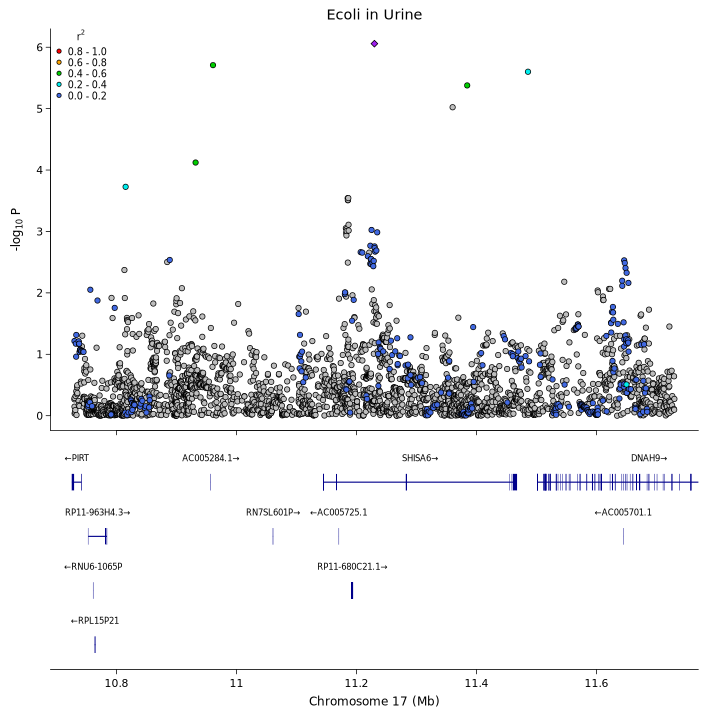


## Supplemental Figure S8. Locus Zoom Severe *E. coli* infection Chr 3 rs62238581 (3.80E-07)


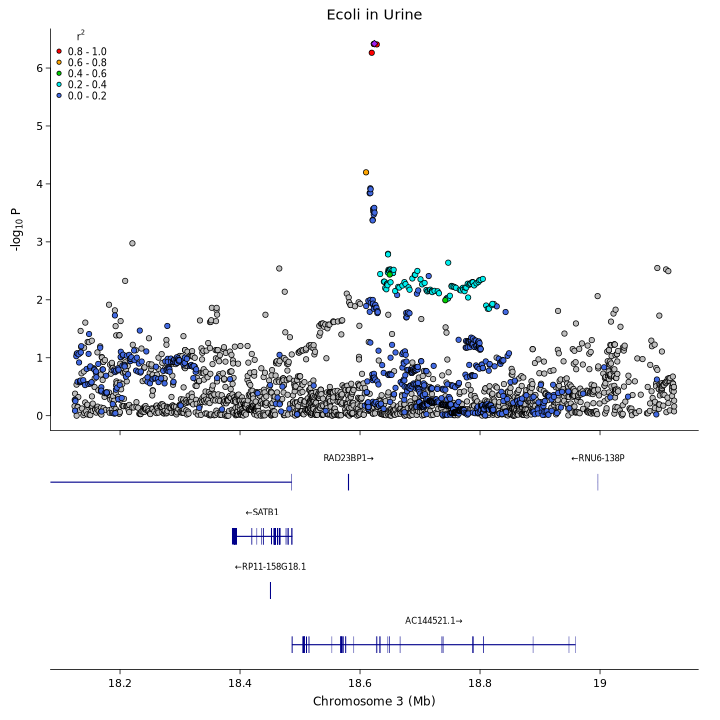


## Supplemental Figure S9. Locus Zoom Severe *E. coli* infection Chr 3 rs113293261 (4.56E-07)


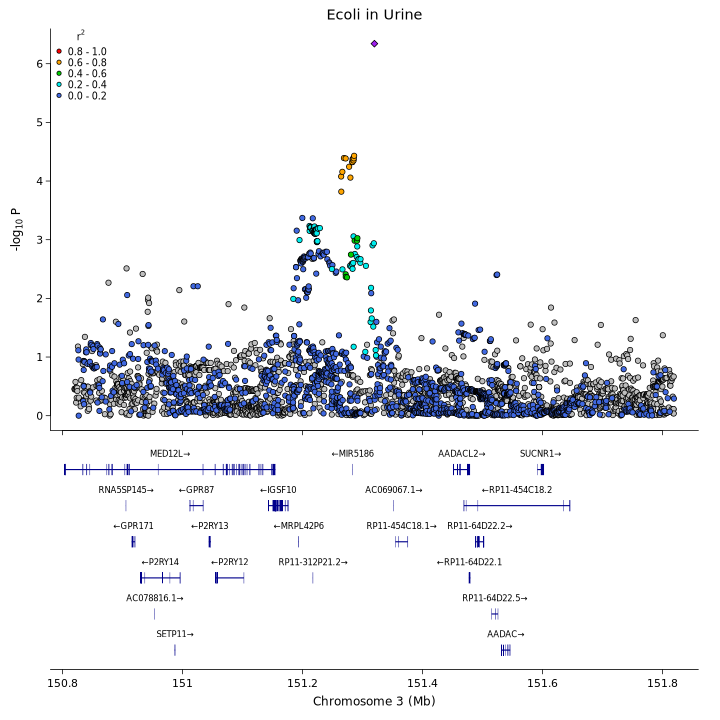


## Supplemental Figure S10. Locus Zoom Severe *E. coli* infection Chr 16 rs7203634 (6.69E-07)


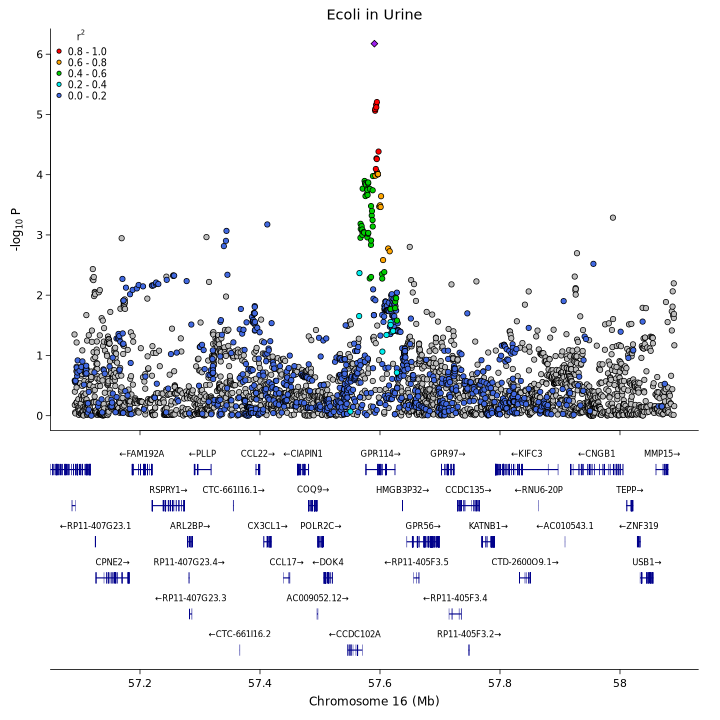


## Supplemental Figure S11. Locus Zoom Severe *E. coli* infection Chr 2 rs74451679 (8.48E-07)


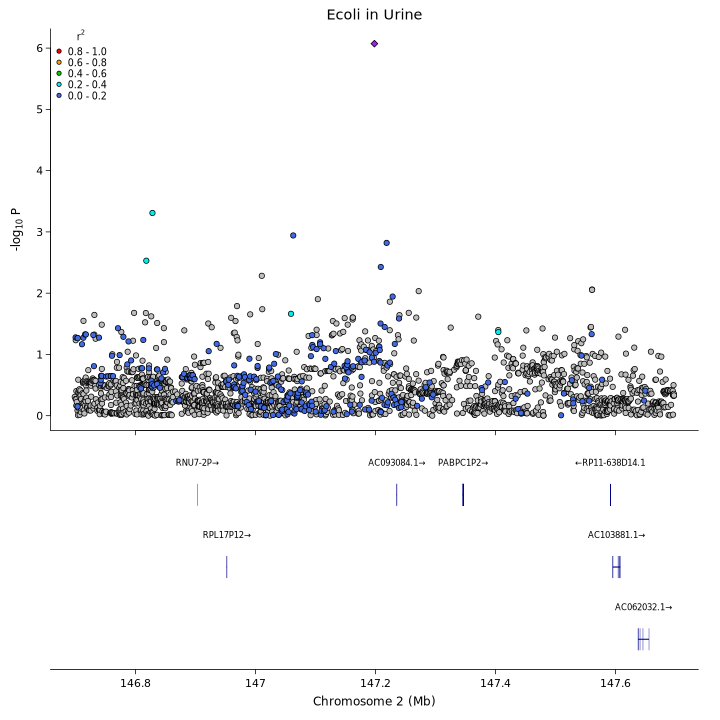


## Supplemental Figure S12. ABT1 Blood Protein Atlas

ABT1 blood protein expression from the Protein Atlas show no regulation in the studied infections; COVID-19, Malaria and Tuberculosis (<https://www.proteinatlas.org/ENSG00000146109-ABT1/blood>, accessed 20251211).


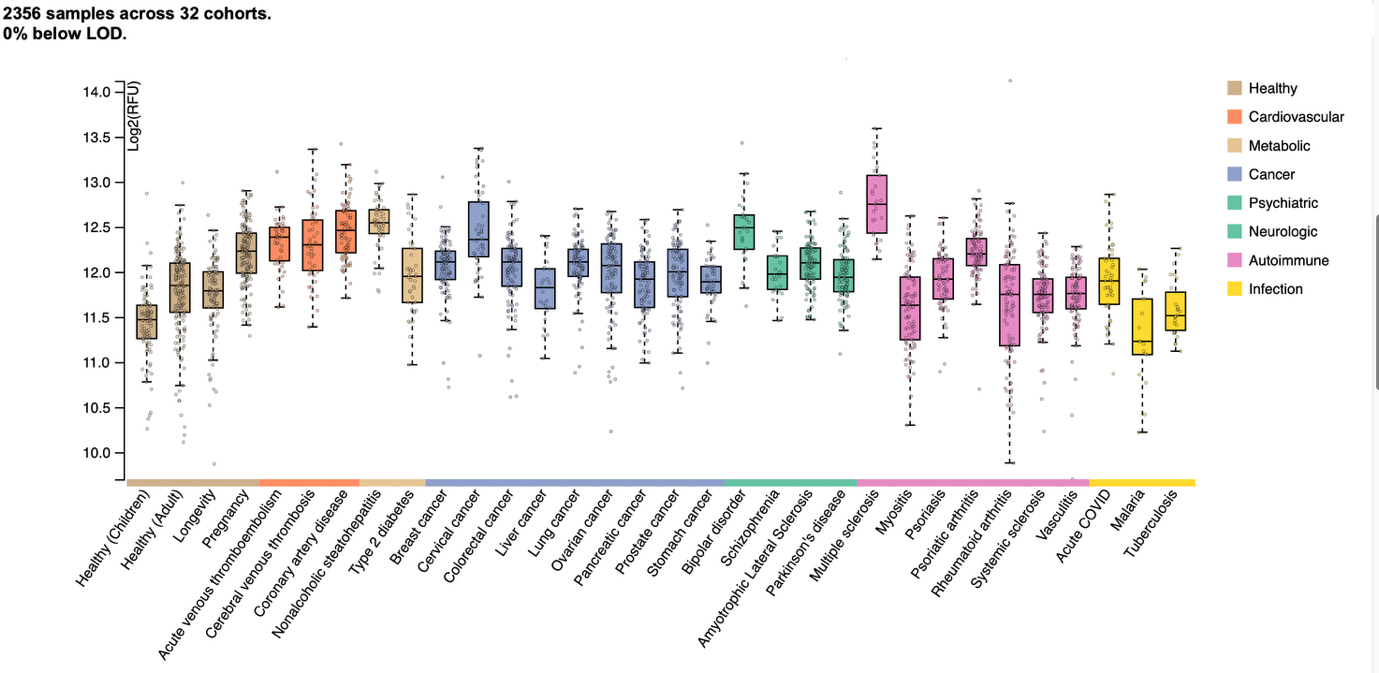


# Supplementary data Description of Pre-imputation QC per cohort

## Epihealth genotype data QC and imputation

Genotyping of blood samples from participants of Epihealth, [Epidemiology for health](https://www.epihealth.se/For-scientists/Research-Application-/).

**Raw data**

- Data received from the [SNP&SEQ Technology Platform](https://www.medsci.uu.se/snpseq_technology_platfom/).

- Illumina Infinium Global Screening Array Multiple Disease.

- GRCh37.

- PLINK data: PLUS strand.

**Pre-imputation QC settings**

Data was genotyped and called in 4 separate batches. QC was performed for each batch:

- Per-sample exclusion filters:

- Missing > 2% or > 5% (for the autosomes and chrX, respectively).

- Non-European ancestry (before HRC imputation).

- Heterozygosity outliers -/+3xIQR from Q1/Q3. Adjusted for ancestry.

- Extreme X-chromosome sex-check outliers based on the F-statistic.

- Per-site exclusion filters:

- Missing > 2%.

- HWE exact p-value < 1e-7 (--hwe midp).

- MAF < 0.5%.

- Not present in 1000G/HRC with matching alleles.

- Allele frequency difference > 0.20 compared with 1000G/HRC.

- Duplicated (first copy kept).

- Not bi-allelic and/or indel.

The per-batch QC:ed data was merged, including sites passing QC in all batches.

Relatedness and PCA were recalculated for the merged data.

Relatedness was tested using the KING algorithm, the maximum unrelated subset (down to 2nd degree) was used.

**Imputation**

- Software:

- chr1-22,X: Michigan Imputation Server v1.4.1 using Eagle v2.4 + minimac v4.

- Panels:

- HRC v1.1 in in hrc1.1/

## COSM-C genotype data

Genotyping of ~4.7k men and ~2.8k women of the [Cohort of Swedish Men Clinical study] (https://www.simpler4health.se/researchers/cohorts/cosmc/).

**Raw data**

- Data received from [Eurofins](https://www.eurofinsgenomics.eu/en/genotyping-gene-expression/).

- pilot: blood and saliva triplicates to evaluate genotyping concordance.

- b1: first batch of genotyping of the blood samples.

- Illumina Infinium Global Screening Array version 3 (GSAv3).

- GRCh37.

- PLINK data: Forward strand.

**Pre-imputation QC settings**

- Per-sample exclusion filters:

- Missing > 2% or > 5% (for the autosomes and chrX, respectively).

- Non-European ancestry.

- Heterozygosity outliers -/+3*IQR from Q1/Q3.

- Extreme X-chromosome sex-check outliers based on the F-statistic.

- Per-site exclusion filters:

- Missing > 2%.

- HWE exact p-value < 1e-7 (--hwe midp).

- MAC < 20.

- Not present in 1000G/HRC with matching alleles.

- Allele frequency difference > 0.15 compared with 1000G/HRC.

- Duplicated (first copy kept).

- Not bi-allelic and/or indel.

533,425 sites and 6,903 samples

Relatedness was tested using the KING algorithm, the maximum unrelated subset (down to 2nd degree) was used.

**Imputation**

- Software:

- chr1-22,X: Michigan Imputation Server v1.2.4 using Eagle v2.4 + minimac v4.

- Panels:

- HRC v1.1 in in hrc1.1/

- Only sites with MAC >= 1 included.

## SIMPLER genotype data

Genotyping of saliva samples from ~33k participants of SIMPLER, [Swedish Infrastructure for Medical Population-based Life-course and Environmental Research](https://www.simpler4health.se/researchers/cohorts/).

**Raw data**

- Data received from [Eurofins] (https://www.eurofinsgenomics.eu/en/genotyping-gene-expression/).

- Illumina Infinium Global Screening Array version 3 (GSAv3).

- GRCh37.

- PLINK data: Forward strand.

**Pre-imputation QC settings**

Data was genotyped and called in five separate batches. QC was performed for each batch:

- Per-sample exclusion filters:

- Missing > 2% or > 5% (for the autosomes and chrX, respectively).

- Non-European ancestry.

- Heterozygosity outliers -/+3xIQR from Q1/Q3. Adjusted for ancestry.

- Extreme X-chromosome sex-check outliers based on the F-statistic.

- Per-site exclusion filters:

- Missing > 2%.

- HWE exact p-value < 1e-7 (--hwe midp).

- MAF < 0.5%.

- Not present in 1000G/HRC with matching alleles.

- Allele frequency difference > 0.20 compared with 1000G/HRC.

- Duplicated (first copy kept).

- Not bi-allelic and/or indel.

The per-batch QC:ed data was merged, including sites passing QC in all batches.

Relatedness and PCA were recalculated for the merged data.

Relatedness was tested using the KING algorithm, the maximum unrelated subset (down to 2nd degree) was used.

**Imputation:**

- Software:

- chr1-22,X: Michigan Imputation Server v1.5.7 using Eagle v2.4 + minimac v4.

- Panels:

- HRC v1.1 in in hrc1.1/

- Only sites with MAC >= 1 included.

## SMCC genotype data

Genotyping of ~5k women of the [Swedish Mammography Cohort Clinical study] (http://www.simpler4health.se/researchers/cohorts/smcc/).

**Raw data**

- Data received from the [SNP&SEQ Technology Platform](https://www.medsci.uu.se/snpseq_technology_platfom/).

- Illumina Infinium Global Screening Array Multiple Disease version 1 (GSA-MD_v1).

**Pre-imputation QC settings**

- Per-sample exclusion filters:

- Missing > 2% (calculated separately for the autosomes and chrX).

- Non-European ancestry.

- Heterozygosity outliers -/+3*IQR from Q1/Q3.

- Extreme X-chromosome sex-check outliers based on the F-statistic.

- Per-site exclusion filters:

- Missing > 2%.

- HWE exact p-value < 1e-7 (--hwe midp).

- MAC < 20.

- Not present in 1000G/HRC with matching alleles.

- Allele frequency difference > 0.2 compared with 1000G/HRC.

- Duplicated (first copy kept).

- Not bi-allelic and/or indel.

535,329 sites and 4,724 samples

Relatedness was tested using the KING algorithm, the maximum unrelated subset (down to 2nd degree) was used.

**Imputation:**

- Software:

- chr1-22: Michigan Imputation Server v1.0.4 using Eagle v2.3 + minimac v3.

- chrX: Michigan Imputation Server v1.2.4 using Eagle v2.4 + minimac v4.

- Panels:

- HRC v1.1 in in hrc1.1/

- Only sites with MAC >= 1 included.
